# Supplementary material
Source: PubMed Central journal article supplement (PMC2577257)
Supplement: pp.108.125757_1.pdf [file pp.108.125757_1.pdf]

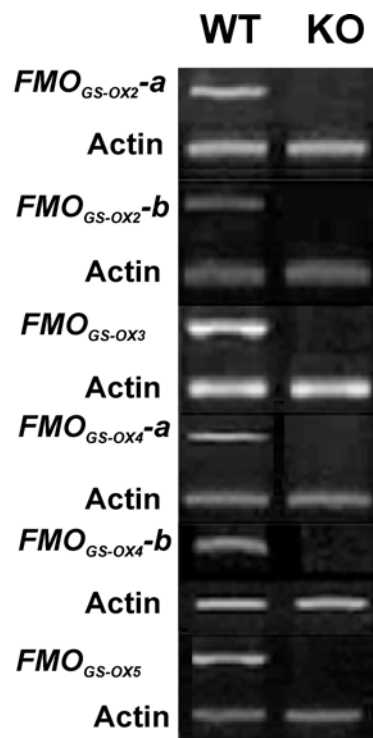

Supplemental Figure S1. Confirmation of *FMO*<sub>GS-OX</sub>S T-DNA mutants by RT-PCR. WT: wild-type. KO: knock-out mutants
