# Supplementary material
Source: PubMed Central journal article supplement (PMC2577257)
Supplement: pp.108.125757_2.pdf [file pp.108.125757_2.pdf]

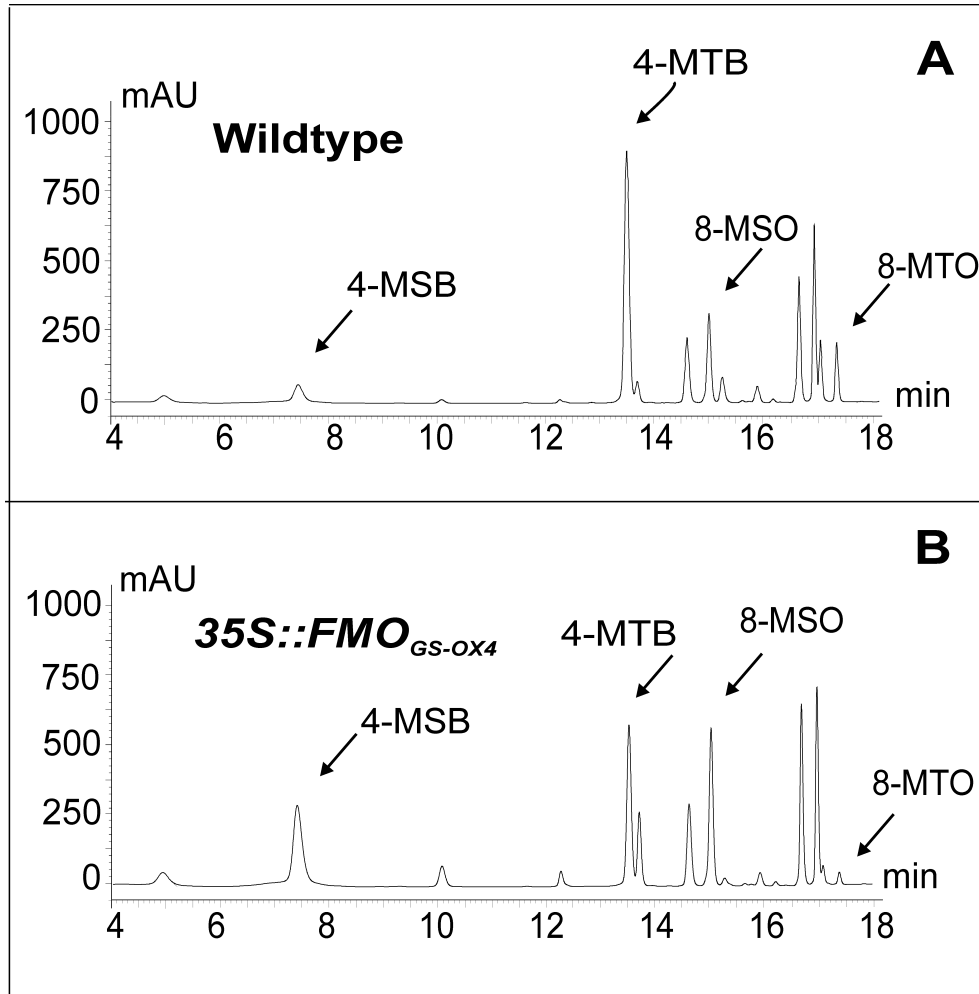

Supplemental Figure S2. Glucosinolate (GSL) profile of seed in T1 generation of  $35S::FMO_{GS-OX4}$  and wild-type plant. A: wild-type plant; B:  $35S::FMO_{GS-OX4}$  line1; Abbreviations: 4-MTB, 4-methylthiobutyl GSL; 4-MSB, 4-methylsulfinylbutyl GSL; 8-MTO, 8-methylthiooctyl GSL; 8-MSO, 8-methylsulfinyl-octyl GSL.
