# Supplementary material
Source: PubMed Central journal article supplement (PMC2577257)
Supplement: pp.108.125757_3.pdf [file pp.108.125757_3.pdf]

**Supplemental table S2.** *Ler x Cvi short-chain aliphatic seed GS-OX Analysis*

| Marker      | DF | TIII SS | F     | P      |
|-------------|----|---------|-------|--------|
| GSAOPp      | 1  | 3.00    | 55.90 | <0.001 |
| HH375       | 1  | 0.25    | 4.81  | 0.030  |
| GH157       | 1  | 0.18    | 3.40  | 0.068  |
| GSELONG     | 1  | 1.54    | 28.76 | <0.001 |
| GH157*HH375 | 1  | 0.25    | 4.80  | 0.030  |

ANOVA was utilized to test previous short-chain glucosinolate data from the *Ler x Cvi* RIL population for QTL located at the position of the two FMO<sub>GS-OX</sub> clusters. These two markers are HH375 and GH157. In addition any previously identified significant main-effect QTL were included in the ANOVA. Type III Sums-of-squares, F value and P value for each term are presented
