# Supplementary material
Source: PubMed Central journal article supplement (PMC2577257)
Supplement: pp.108.125757_4.pdf [file pp.108.125757_4.pdf]

**Supplemental table S3.** *Ler x Cvi short-chain aliphatic leaf GS-OX Analysis*

| Marker      | DF | TIII SS | F    | P     |
|-------------|----|---------|------|-------|
| HH375       | 1  | 0.03    | 1.38 | 0.257 |
| GSELONG     | 1  | 0.20    | 7.44 | 0.014 |
| GH157       | 1  | 0.18    | 6.65 | 0.020 |
| EC198       | 1  | 0.08    | 3.01 | 0.102 |
| GH157*HH375 | 1  | 0.16    | 5.93 | 0.026 |

ANOVA was utilized to test previous short-chain glucosinolate data from the *Ler x Cvi* RIL population for QTL located at the position of the two FMO<sub>GS-OX</sub> clusters. These two markers are HH375 and GH157. In addition any previously identified significant main-effect QTL was included in the ANOVA. Type III Sums-of-squares, F value and P value for each term are presented.
