# Supplementary material
Source: PubMed Central journal article supplement (PMC2577257)
Supplement: pp.108.125757_5.pdf [file pp.108.125757_5.pdf]

**Supplemental table S6. Altered GS-OX activity in the T1 generation  $FMO_{GS-OX4}$  overexpression lines**

Glucosinolate (GSL) content in seeds were analyzed. MT: (MS+MT) represents the S-oxygenation activity for the conversion from methylthioalkyl GSL to methylsulfinylalkyl GSL.

| MT:(MS+MT)     | T1 35S:: $FMO_{GS-OX4}$ |                 | Col-0 |       |                 |
|----------------|-------------------------|-----------------|-------|-------|-----------------|
|                | Mean <sup>a</sup>       | SE <sup>b</sup> | Mean  | SE    | $P_{gene}^c$    |
| Propyl GSL(C3) | 0.69                    | 0.001           | 0.68  | 0.003 | NS <sup>d</sup> |
| Butyl GSL(C4)  | 0.67                    | 0.001           | 0.74  | 0.001 | 0.01            |
| Pentyl GSL(C5) | 0.47                    | 0.002           | 0.81  | 0.005 | <0.001          |
| Hexyl GSL(C6)  | ND <sup>e</sup>         |                 | ND    |       |                 |
| Heptyl GSL(C7) | 0.33                    | 0.002           | 0.75  | 0.011 | 0.002           |
| Octyl GSL(C8)  | 0.13                    | 0.004           | 0.33  | 0.005 | 0.02            |

<sup>a</sup>Mean is the mean value of MT:(MS+MT) of each given group; <sup>b</sup>SE is standard error for the mean value; <sup>c</sup> $P_{gene}$  is the  $P$  value for the differences between the two genotypes, wild-type versus 35S:: $FMO_{GS-OX4}$  overexpression lines; <sup>d</sup>NS indicates non-significant  $P$  values( $P>0.05$ ); <sup>e</sup>ND indicates that the given GSL was not detectable, therefore no statistical analyses was conducted.
